# Supplementary material for: Identification of Genomic Associations for Adult Plant Resistance in the Background of Popular South Asian Wheat Cultivar, PBW343
Source: Front Plant Sci. 2016 Nov 8;7:1674. doi: 10.3389/fpls.2016.01674 (PMC5099247; doi:10.3389/fpls.2016.01674)
Supplement: Supplementary file 9 [file Table9.XLSX]

## Sheet: Supplementary Table 9
Supplementary Table 9 Linkage map of family PBW343 x Kingbird
Marker	Chromosome	Linkage Group	Position (cM)
wPt-741357	1AS	1	0
wPt-664778	1AS	1	0
wPt-671790	1AS	1	0
wPt-666776	1AS	1	0
wPt-1924	1AS	1	5.28
wPt-8455	1AS	1	5.88
wPt-669484	1AS	1	6.45
wPt-731846	1AS	1	8.24
wPt-2527	1AS	1	9.46
wPt-5660	1AL	1	49.7
wPt-733904	1AL	1	49.7
wPt-733811	1AL	1	49.7
wPt-2847	1AL	1	49.7
wPt-730885	1AL	1	49.7
wPt-666616	1AL	1	49.7
wPt-9938	1AL	1	49.7
wPt-667252	1AL	1	49.7
wPt-4408	1AL	1	49.7
tPt-1012	1AL	1	50.29
wPt-0128	1AL	1	52.1
wPt-7339	1AL	1	53.93
wPt-7784	1AL	1	58.43
wPt-4897	1AL	1	64.62
wPt-3836	1AL	1	80.19
tPt-7724	1AL	1	80.19
wPt-3712	1AL	1	80.19
tPt-1419	1AL	1	80.19
wPt-8644	1AL	1	80.19
wPt-6754	1AL	1	80.19
wPt-732881	1AL	1	80.19
wPt-669800	1AL	1	80.19
wPt-669294	1AL	1	80.19
wPt-666087	1AL	1	80.19
wPt-730902	1AL	1	80.19
wPt-667288	1AL	1	80.19
wPt-734288	1AL	1	80.19
wPt-2497	1AL	1	80.19
wPt-733820	1AL	1	80.19
wPt-734285	1AL	1	80.19
wPt-732377	1AL	1	80.19
wPt-732717	1AL	1	80.19
wPt-6853	1AL	1	83.28
wPt-744613	1AL	1	84.5
wPt-1011	1AL	1	86.37
wPt-664703	1AL	1	91.59
wPt-664593	1AL	1	91.59
tPt-6091	1AL	1	91.59
wPt-1786	1AL	1	91.59
wPt-7147	1AL	1	92.23
wPt-732616	1AL	1	92.23
wPt-5160	1AL	1	92.23
wPt-6005	1AL	1	92.23
wPt-668205	1AL	1	94.01
wPt-732144	1AL	1	95.8
wPt-0258	1AL	1	99.1
wPt-5870	1AL	1	132.22
wPt-665027	1AL	1	135.56
wPt-667413	1AL	1	135.56
wPt-664968	1AL	1	175.16
wPt-664972	1AL	1	175.76
wPt-732092	1AL	1	199.65
wPt-671956	1AL	1	202.47
wPt-672034	1AL	1	205.33
wPt-0831	1AL	1	250.81
wPt-0359	1AL	1	250.81
wPt-2614	1AL	1	250.81
wPt-2261	1AL	1	250.81
wPt-7529	1AL	1	250.81
wPt-9883	1AL	1	250.81
wPt-0974	1AL	1	250.81
wPt-5765	1AL	1	250.81
wPt-740807	1AL	1	250.81
wPt-0320	1AL	1	250.81
wPt-9522	1AL	1	250.81
wPt-9472	1AL	1	250.81
wPt-3177	1AL	1	250.81
wPt-9975	1AL	1	251.4
wPt-8338	1AL	1	252
wPt-9631	1AL	1	252.58
wPt-3282	1AL	1	252.58
wPt-5067	1AL	1	252.58
wPt-742776	1AL	1	253.83
wPt-1997	1AL	1	254.46
wPt-8261	1AL	1	255.93
wPt-0260	1AL	1	256.67
wPt-2859	1AL	1	257.33
wPt-741704	1AL	1	257.33
wPt-665375	1AL	1	258.57
wPt-7905	1AL	1	258.57
wPt-2075	1AL	1	258.57
wPt-1251	1AL	1	258.57
wPt-4434	1AL	1	258.57
wPt-2810	1AL	1	258.57
wPt-5065	1AL	1	258.57
wPt-6078	1AL	1	259.22
wPt-1346	1AL	1	259.83
wPt-9462	1AL	1	260.47
wPt-0729	1AL	1	260.47
wPt-665590	1AL	1	286.72
wPt-4801	1AL	1	289.22
wPt-732970	1AL	1	296.74
wPt-6074	1AL	1	303.4
wPt-8172	1AL	1	312.59
wPt-665725	1AL	1	320.23
wPt-6139	1AL	1	323.52
wPt-3451	1BS	2	0
rPt-1767	1BS	2	2.53
rPt-8894	1BS	2	2.53
tPt-2440	1BS	2	3.15
wPt-1781	1BS	2	6.28
rPt-9564	1BS	2	9.37
tPt-6015	1BS	2	10.56
wPt-3266	1BS	2	13.6
rPt-5341	1BS	2	16.58
tPt-7559	1BS	2	17.16
tPt-4566	1BS	2	17.73
rPt-6965	1BS	2	17.73
tPt-1586	1BS	2	17.73
tPt-7214	1BS	2	17.73
tPt-2550	1BS	2	17.73
tPt-2326	1BS	2	17.73
tPt-2240	1BS	2	17.73
tPt-3696	1BS	2	17.73
rPt-3642	1BS	2	17.73
rPt-2869	1BS	2	17.73
tPt-8754	1BS	2	17.73
tPt-0136	1BS	2	17.73
tPt-0734	1BS	2	17.73
tPt-8109	1BS	2	17.73
tPt-9682	1BS	2	18.36
wPt-9977	1BS	2	19.79
wPt-3824	1BS	2	20.46
tPt-0325	1BS	2	21.07
wPt-5801	1BS	2	21.07
wPt-8177	1BS	2	21.7
wPt-742457	1BS	2	21.7
wPt-8682	1BS	2	22.93
wPt-5740	1BS	2	22.93
wPt-5279	1BS	2	22.93
wPt-4343	1BS	2	22.93
wPt-741749	1BS	2	22.93
wPt-6370	1BS	2	22.93
wPt-2762	1BS	2	23.51
wPt-1911	1BS	2	23.51
wPt-6117	1BS	2	23.51
wPt-3787	1BS	2	23.51
wPt-6719	1BS	2	23.51
wPt-5325	1BS	2	23.51
wPt-742017	1BS	2	23.51
wPt-8930	1BS	2	23.51
tPt-5080	1BS	2	23.51
wPt-7708	1BS	2	26.41
rPt-6561	1BS	2	29.31
tPt-5755	1BS	2	29.92
tPt-7918	1BS	2	29.92
rPt-0079	1BS	2	29.92
tPt-1051	1BS	2	29.92
tPt-2076	1BS	2	29.92
tPt-4377	1BS	2	29.92
tPt-5515	1BS	2	29.92
tPt-9585	1BS	2	29.92
rPt-4523	1BS	2	30.51
rPt-7959	1BS	2	31.73
wPt-9490	1BS	2	35.11
wPt-4107	1BS	2	36.46
wPt-0595	1BS	2	37.07
rPt-2040	1BS	2	37.69
wPt-5798	1BS	2	38.32
wPt-741274	1BS	2	38.32
wPt-7359	1BS	2	38.32
wPt-4306	1BS	2	38.93
wPt-5435	1BS	2	38.93
wPt-2577	1BS	2	38.93
wPt-7094	1BS	2	38.93
wPt-4655	1BS	2	38.93
wPt-8267	1BS	2	38.93
wPt-7259	1BS	2	38.93
wPt-2575	1BS	2	38.93
wPt-1717	1BS	2	38.93
wPt-3477	1BS	2	38.93
wPt-742398	1BS	2	38.93
wPt-9903	1BS	2	38.93
wPt-2786	1BS	2	38.93
wPt-668076	1BS	2	38.93
wPt-7460	1BS	2	38.93
wPt-664964	1BS	2	39.51
wPt-5678	1BS	2	39.51
wPt-2988	1BS	2	39.51
wPt-2395	1BS	2	39.51
wPt-6833	1BS	2	39.51
wPt-743523	1BS	2	39.51
wPt-2019	1BS	2	39.51
wPt-2474	1BS	2	39.51
wPt-742513	1BS	2	39.51
wPt-741799	1BS	2	39.51
wPt-8616	1BS	2	40.1
wPt-2057	1BS	2	40.1
wPt-3465	1BS	2	40.1
wPt-9524	1BS	2	40.72
wPt-6442	1BS	2	42.11
wPt-741612	1BL	2	44.17
wPt-2389	1BL	2	46.91
wPt-2315	1BL	2	51.27
wPt-1573	1BL	2	56.55
wPt-1387	1DS	3	0
wPt-7946	1DS	3	3.85
wPt-7953	1DS	3	15.79
wPt-3738	1DS	3	25.13
wPt-665814	1DS	3	51.42
wPt-9380	1DS	3	52.02
wPt-668040	1DS	3	52.02
wPt-666832	1DS	3	52.02
wPt-0413	1DS	3	53.36
wPt-4671	1DS	3	54.69
wPt-671545	1DS	3	55.29
wPt-734229	1DS	3	59.25
rPt-4471	1DS	3	75.97
wPt-5320	1DS	3	92.37
wPt-7140	1DS	3	99.68
wPt-729826	1DS	3	122.43
tPt-6504	2AS	4	0
wPt-7024	2AL	4	49.24
wPt-7011	2AL	4	63.59
wPt-9793	2AL	4	76.36
wPt-9277	2AL	4	76.97
wPt-1505	2BS	5	0
tPt-4125	2BS	5	6.49
wPt-0162	2BS	5	53.11
wPt-7970	2BS	5	91.87
wPt-1813	2BS	5	100.74
wPt-9230	2BS	5	106.68
wPt-7672	2BS	5	106.68
wPt-0100	2BS	5	106.68
wPt-1024	2BS	5	111.9
wPt-4916	2BS	5	111.9
wPt-744022	2BS	5	112.49
wPt-2106	2BS	5	120.78
wPt-6271	2BS	5	127.87
wPt-5250	2BS	5	134.76
wPt-1266	2BS	5	139.44
tPt-4627	2BS	5	168.11
wPt-1964	2BS	5	168.11
wPt-7985	2BS	5	181.08
wPt-743630	2BS	5	181.08
wPt-3983	2BS	5	186.9
wPt-3561	2BS	5	191.39
wPt-4125	2BS	5	202.4
wPt-7757	2BS	5	202.4
wPt-5672	2BS	5	202.4
wPt-6192	2BS	5	202.4
wPt-5556	2BS	5	202.4
wPt-2430	2BL	5	210.7
wPt-0094	2BL	5	213.82
wPt-2327	2BL	5	222.36
wPt-1646	2BL	5	232.8
wPt-0489	2BL	5	238.3
wPt-7305	2BL	5	241.47
wPt-666931	2BL	5	251.15
tPt-4248	2BL	5	256.5
wPt-7161	2BL	5	259.71
wPt-4701	2BL	5	262.31
tPt-5438	2BL	5	264.85
wPt-669385	2BL	5	301.1
wPt-7829	2BL	5	340.7
wPt-2135	2BL	5	341.32
wPt-3378	2BL	5	341.32
wPt-2274	2BL	5	343.17
wPt-2724	2BL	5	345.12
wPt-5017	2BL	5	357.49
wPt-4413	2DL	6	0
wPt-665868	2DL	6	10.82
wPt-2652	2DL	6	15.77
wPt-666656	2DL	6	15.77
wPt-3677	2DL	6	16.36
wPt-734322	2DL	6	21.44
wPt-742606	2DL	6	26.66
wPt-2644	2DL	6	32.85
wPt-667584	2DL	6	39.05
wPt-0298	2DL	6	39.05
wPt-731148	2DL	6	39.05
wPt-4725	3AS	7	0
tPt-6949	3AS	7	45.38
wPt-0951	3AS	7	46.6
tPt-0519	3AS	7	47.85
wPt-10311	3AS	7	57.39
wPt-743723	3AS	7	64.98
wPt-1353	3AS	7	66.23
wPt-7890	3AS	7	66.23
wPt-1655	3AS	7	70.18
wPt-2866	3AS	7	79.1
wPt-745076	3AS	7	83.06
wPt-0714	3AS	7	83.06
wPt-1688	3AS	7	84.32
wPt-7860	3AL	7	87.57
wPt-1925	3AL	7	106.25
tPt-3563	3AL	7	106.25
tPt-3858	3AL	7	106.85
wPt-6357	3AL	7	106.85
wPt-8886	3BS	8	0
wPt-1484	3BS	8	22.01
wPt-6216	3BS	8	23.38
wPt-9579	3BS	8	24.75
wPt-2936	3BS	8	25.98
wPt-732044	3BS	8	31.64
wPt-5105	3BS	8	31.64
wPt-664393	3BS	8	31.64
wPt-9170	3BS	8	31.64
wPt-7015	3BS	8	31.64
tPt-1366	3BS	8	31.64
tPt-1759	3BS	8	31.64
wPt-1191	3BS	8	34.28
wPt-733544	3BS	8	38.34
wPt-0895	3BS	8	38.34
wPt-0013	3BS	8	38.34
wPt-732330	3BS	8	38.34
wPt-2193	3BS	8	38.34
wPt-2766	3BS	8	38.34
wPt-2298	3BS	8	38.34
wPt-0086	3BS	8	40.84
wPt-3726	3BS	8	52.98
wPt-743661	3BS	8	54.24
rPt-5396	3BS	8	54.24
wPt-11032	3BS	8	54.24
wPt-8915	3BS	8	54.89
wPt-5939	3BS	8	54.89
wPt-9510	3BS	8	54.89
wPt-9432	3BS	8	54.89
wPt-11295	3BS	8	55.52
wPt-10323	3BS	8	57.52
wPt-3078	3BS	8	59.4
wPt-11218	3BS	8	59.4
wPt-9443	3BS	8	59.4
wPt-6047	3BS	8	60.65
wPt-7142	3BS	8	63.21
wPt-743775	3BS	8	63.21
wPt-10033	3BS	8	63.21
wPt-10490	3BS	8	63.21
wPt-9310	3BS	8	63.21
wPt-9433	3BS	8	63.21
wPt-741571	3BS	8	63.21
wPt-10497	3BS	8	67.71
wPt-10003	3BS	8	68.29
wPt-1940	3BS	8	68.29
wPt-4364	3BS	8	68.9
wPt-731910	3BS	8	68.9
wPt-7786	3BS	8	69.48
wPt-10546	3BS	8	76.68
wPt-8096	3BL	8	78.44
wPt-11400	3BL	8	78.44
wPt-5906	3BL	8	78.44
wPt-10176	3BL	8	102.1
wPt-5704	3BL	8	110.63
wPt-10537	3BL	8	122.57
wPt-0912	3BL	8	128.94
wPt-9368	3BL	8	129.53
wPt-2685	3BL	8	138.19
wPt-731593	3BL	8	140.16
wPt-10758	3BL	8	147.35
wPt-6834	3BL	8	147.95
wPt-8206	3BL	8	156.11
wPt-731663	3BL	8	161.12
wPt-733251	3BL	8	170.24
wPt-729972	3BL	8	212.68
wPt-732457	3BL	8	224.37
wPt-7225	3BL	8	267.31
wPt-8446	3BL	8	267.31
wPt-1620	3BL	8	267.9
wPt-5209	3BL	8	268.48
wPt-5522	3BL	8	268.48
wPt-9496	3BL	8	273.91
wPt-800213	3BL	8	292.45
wPt-3761	3BL	8	295.75
wPt-3609	3BL	8	295.75
wPt-3921	3BL	8	298.65
wPt-1081	3BL	8	303.89
wPt-9066	3BL	8	308.83
wPt-742528	3BL	8	314.15
wPt-742060	3BL	8	314.15
wPt-742253	3BL	8	314.79
wPt-740604	3BL	8	314.79
wPt-742648	3BL	8	315.42
wPt-2313	3DS	9	0
wPt-742500	3DS	9	0
wPt-740653	3DS	9	0
wPt-740613	3DS	9	0
wPt-742344	3DS	9	0
wPt-742314	3DS	9	0
wPt-667328	3DS	9	0.6
wPt-741164	3DS	9	0.6
wPt-742587	3DS	9	0.6
wPt-742396	3DS	9	0.6
wPt-742025	3DS	9	0.6
wPt-668064	3DS	9	0.6
wPt-742368	3DS	9	0.6
wPt-4569	3DS	9	0.6
wPt-742154	3DS	9	0.6
wPt-742189	3DS	9	0.6
wPt-741921	3DS	9	1.19
wPt-742445	3DS	9	1.78
wPt-671808	3DS	9	1.78
wPt-740796	3DS	9	1.78
wPt-742717	3DS	9	1.78
wPt-742323	3DS	9	1.78
wPt-740739	3DS	9	1.78
wPt-740710	3DS	9	1.78
wPt-0610	4AL	10	0
wPt-6867	4AL	10	0.59
wPt-4828	4AL	10	1.17
wPt-4620	4AL	10	1.17
wPt-1961	4AL	10	1.75
wPt-1155	4AL	10	2.33
wPt-4424	4AL	10	2.33
wPt-0023	4AL	10	2.33
wPt-9675	4AL	10	2.33
wPt-8167	4AL	10	4.87
wPt-8271	4AL	10	4.87
wPt-9183	4AL	10	4.87
wPt-0538	4AL	10	7.31
wPt-7807	4AL	10	10.09
wPt-3349	4AL	10	12.17
wPt-6502	4AL	10	12.78
wPt-730913	4AL	10	12.78
wPt-6440	4AL	10	12.78
wPt-2533	4AL	10	14.61
wPt-8091	4AL	10	14.61
wPt-5642	4AL	10	14.61
wPt-2836	4AL	10	14.61
wPt-669526	4AL	10	15.2
wPt-1161	4AL	10	16.38
wPt-5578	4AL	10	16.97
wPt-6900	4AL	10	16.97
wPt-743028	4AL	10	16.97
wPt-9645	4AL	10	16.97
wPt-2982	4AL	10	20.1
tPt-0602	4BS	11	0
wPt-1708	4BS	11	4.81
wPt-8796	4BL	11	8.19
wPt-7062	4BL	11	13.28
wPt-5787	5AS	12	0
wPt-4249	5AS	12	7.29
wPt-740799	5AL	12	7.9
tPt-7433	5AL	12	50.06
wPt-1038	5AL	12	58.6
wPt-9006	5BS	13	0
wPt-1432	5BS	13	1.22
wPt-7542	5BS	13	7.5
tPt-8942	5BS	13	31.03
wPt-2586	5BS	13	33.77
wPt-5175	5BS	13	42.05
wPt-5346	5BS	13	42.05
wPt-665267	5BS	13	42.05
wPt-6348	5BS	13	42.05
wPt-798756	5BS	13	42.69
wPt-9666	5BS	13	49.34
wPt-9724	5BS	13	49.34
wPt-744314	5BS	13	51.24
wPt-0819	5BS	13	51.84
wPt-8604	5BS	13	51.84
wPt-742141	5BL	13	67.48
tPt-7755	5BL	13	68.07
wPt-7114	5BL	13	71.78
wPt-666939	5BL	13	81.63
wPt-3661	5BL	13	91.27
wPt-4418	5BL	13	116.65
wPt-7238	5BL	13	132.7
wPt-6971	5BL	13	136.5
wPt-730613	5BL	13	139.67
wPt-3922	5BL	13	141.64
wPt-0484	5BL	13	145.07
wPt-4402	5BL	13	156.82
wPt-6014	5BL	14	0
wPt-5896	5BL	14	1.27
wPt-1733	5BL	14	9.56
wPt-6597	5BL	14	22.71
wPt-9598	5BL	14	22.71
wPt-9103	5BL	14	22.71
wPt-3204	5BL	14	22.71
wPt-1482	5BL	14	23.31
wPt-7059	5BL	14	23.31
wPt-729839	6AS	15	0
tPt-8557	6AS	15	1.88
wPt-7063	6AS	15	5.17
wPt-732125	6AS	15	5.17
wPt-732035	6AS	15	5.17
wPt-667618	6AS	15	5.17
wPt-7373	6AS	15	5.17
wPt-731499	6AS	15	5.17
wPt-730729	6AS	15	47.33
wPt-4791	6AS	15	48.61
wPt-733764	6AS	15	49.21
wPt-9584	6AS	15	49.21
wPt-664733	6AS	15	49.21
wPt-667780	6AS	15	49.21
wPt-2822	6AS	15	49.21
wPt-666208	6AS	15	49.8
wPt-671799	6AS	15	50.39
wPt-664552	6AS	15	50.39
wPt-3965	6AS	15	51.04
wPt-731010	6AS	15	51.04
wPt-7623	6AS	15	51.04
wPt-732760	6AS	15	51.04
wPt-3605	6AS	15	52.29
tPt-7399	6AS	15	53.61
wPt-3524	6AS	15	59.89
tPt-2833	6AS	15	59.89
wPt-731842	6AS	15	59.89
wPt-732062	6AS	15	59.89
wPt-9679	6AS	15	59.89
wPt-731934	6AS	15	59.89
rPt-9065	6AS	15	59.89
wPt-5652	6AS	15	63.85
wPt-731250	6AS	15	68.59
wPt-741547	6AS	15	71.09
wPt-6904	6AS	15	72.9
wPt-671855	6AS	15	72.9
tPt-0877	6AS	15	72.9
wPt-7840	6AS	15	74.71
wPt-730142	6AS	15	80.13
wPt-731077	6AS	15	80.13
wPt-742680	6AS	15	80.13
wPt-731054	6AS	15	80.73
wPt-732611	6AS	15	81.35
wPt-741630	6AS	15	84.78
wPt-9382	6AS	15	85.41
wPt-4907	6AS	15	85.41
wPt-1664	6AS	15	85.41
wPt-7475	6AS	15	91.07
wPt-5964	6AS	15	94.28
wPt-741170	6AS	15	94.87
wPt-671561	6AS	15	95.47
wPt-732691	6AS	15	97.91
wPt-664589	6AS	15	100.35
wPt-729904	6AL	15	133.61
wPt-741026	6AL	15	134.19
tPt-8161	6BS	16	0
wPt-5211	6BS	16	0
wPt-3168	6BS	16	2.63
wPt-743099	6BS	16	3.28
wPt-3203	6BS	16	31.45
wPt-2297	6BS	16	35.31
tPt-4887	6BS	16	35.93
tPt-3506	6BS	16	35.93
wPt-7576	6BS	16	35.93
wPt-664142	6BS	16	38.17
wPt-4858	6BS	16	40.12
wPt-7745	6BS	16	41.34
wPt-664250	6BS	16	41.34
wPt-4930	6BS	16	47.71
wPt-4142	6BS	16	49.03
wPt-667798	6BS	16	52.33
wPt-745052	6BS	16	52.33
wPt-1541	6BL	17	0
wPt-4662	6BL	17	2.44
wPt-8059	6BL	17	5.49
wPt-9256	6BL	17	8.55
wPt-1761	6BL	17	10.33
wPt-8211	6BL	17	33.53
wPt-3502	6DL	18	0
wPt-731465	6DL	18	6.76
wPt-667006	6DL	18	9.93
wPt-731605	6DL	18	9.93
wPt-667726	6DL	18	9.93
wPt-665675	6DL	18	15.14
wPt-4602	6DL	18	17.02
wPt-3226	7AS	19	0
wPt-743510	7AS	19	25.54
wPt-0808	7AS	19	26.89
wPt-672171	7AS	19	28.16
wPt-672051	7AS	19	28.77
wPt-665253	7AS	19	28.77
wPt-664558	7AS	19	28.77
wPt-6075	7AS	19	31.98
wPt-8043	7AS	19	33.83
wPt-6967	7AS	19	33.83
wPt-742051	7AS	19	34.42
wPt-8418	7AS	19	35.72
tPt-6794	7AS	19	37.05
wPt-2371	7AS	19	38.39
wPt-0031	7AS	19	40.36
wPt-8192	7AS	19	45.04
wPt-667538	7AS	19	66.67
wPt-5350	7AS	19	92.21
wPt-6931	7AS	19	92.21
wPt-0205	7AL	19	134.37
wPt-3393	7AL	19	135.67
tPt-0242	7AL	19	170.94
tPt-8743	7AL	19	171.56
wPt-3782	7AL	19	205.58
wPt-2083	7AL	19	210.46
wPt-4553	7AL	19	227.48
wPt-0961	7AL	19	228.69
wPt-8375	7AL	19	245.08
wPt-3398	7BL	20	0
wPt-9251	7BL	20	1.9
wPt-3939	7BL	20	29.36
wPt-8040	7BL	20	35.22
wPt-5216	7BL	20	50.09
wPt-0884	7BL	20	63.62
wPt-5646	7BL	20	78.32
wPt-2994	7BL	21	0
wPt-3723	7BL	21	5.21
wPt-9925	7BL	21	13.75
wPt-4258	7BL	21	22.4
wPt-731734	7BL	21	51.07
wPt-665936	7DS	23	0
wPt-667127	7DS	23	0
wPt-7508	7DS	23	0
wPt-732683	7DL	22	0
wPt-664022	7DL	22	1.92
wPt-672113	7DL	22	3.93
wPt-2339	7DL	22	5.3
wPt-663848	7DL	22	5.97
wPt-663984	7DL	22	6.6
wPt-743602	7DL	22	6.6
wPt-0827	7DL	22	8.62
